# Supplementary material for: Never lose sight of enemies: giant honeybees perceive troublemakers even in mass flight mode—a case study
Source: Frontiers journal article supplement (doi:10.3389/frbee.2024.1411720), 2025-01-30
Supplement: Data_Sheet_1.pdf [file Data_Sheet_1.pdf]

## Supplementary Material / Equations

### Equation 1. Measurement of the framewise change of pixel luminance

|     |                                                       |                                                                                                                                                                                                                                                                                                                                                                                                                                                                                                                                                                                                                                                                                                                                                                                       |
|-----|-------------------------------------------------------|---------------------------------------------------------------------------------------------------------------------------------------------------------------------------------------------------------------------------------------------------------------------------------------------------------------------------------------------------------------------------------------------------------------------------------------------------------------------------------------------------------------------------------------------------------------------------------------------------------------------------------------------------------------------------------------------------------------------------------------------------------------------------------------|
| (1) | $\Delta lum_{px} = lum_{px}(t_i) - lum_{px}(t_{i-1})$ | <p><i>Image analysis of motion activity: defining pixel luminance change.</i></p> <p>The term <math>lum_{px}</math> (Eq#1) defines the 24-bit RGB luminance (R: 0-255; G: 0-255; B: 0-255) of a single pixel area [px] in frame <math>f_i</math> at time <math>t_i</math>. The differential luminance value <math>\Delta lum_{px}</math> describes the change in luminance of a pixel area in the time interval <math>\Delta t</math> between the two time points <math>[t_{i-1}, t_i]</math> corresponding with the interval between the two sequential frames <math>[f_{i-1}, f_i]</math>. Due to the frame rate of 60 Hz used, the time interval in which the differential luminance (<math>\Delta lum_{px}</math>) was analysed was 16.67 ms (further information, see [49]).</p> |
|-----|-------------------------------------------------------|---------------------------------------------------------------------------------------------------------------------------------------------------------------------------------------------------------------------------------------------------------------------------------------------------------------------------------------------------------------------------------------------------------------------------------------------------------------------------------------------------------------------------------------------------------------------------------------------------------------------------------------------------------------------------------------------------------------------------------------------------------------------------------------|

### Equations 2. Definition of *motion-active* pixels

|      |                  |                                                                                                                                                                                                                                                                                                                                                                                                                                                                                                                                                                                                                                                                                                                                                                                                                                                                                                                                                                                                                                                                                        |
|------|------------------|----------------------------------------------------------------------------------------------------------------------------------------------------------------------------------------------------------------------------------------------------------------------------------------------------------------------------------------------------------------------------------------------------------------------------------------------------------------------------------------------------------------------------------------------------------------------------------------------------------------------------------------------------------------------------------------------------------------------------------------------------------------------------------------------------------------------------------------------------------------------------------------------------------------------------------------------------------------------------------------------------------------------------------------------------------------------------------------|
| (2A) | $mot_a [px] = 1$ | <p><i>Image analysis of motion activity: Definition of the pixel status of motion activity.</i></p> <p><i>Motion-active state:</i> a selected pixel area [px] with <math>\Delta lum_{px} &gt; lum_{th}</math> (Eq#2A)</p> <p><i>Motionless state:</i> for a selected pixel area [px] with <math>\Delta lum_{px} \leq lum_{th}</math> (Eq#2B)</p> <p>A single pixel is specified in this document as “px” for a length or as “[px]” for an area. The RGB luminance values (<math>\Delta lum_{px}</math>; Eq#1) form the basis for the distinction between <i>motion-active</i> and <i>motionless</i> state, which is determined for each individual pixel area [px]. <i>Motion</i> activity is detected at the pixel area [px] (Eq#2B) when the RGB luminance exceeded the threshold value <math>lum_{th} = 10</math>. For the 24-bit RGB luminance with the range of 0...255 for each of the three RGB domains this threshold results in <math>lum_{th} [R] * lum_{th} [G] * lum_{th} [B] = 1\,000</math>, which corresponds to the share of 6.03086 E-05 in the total data space.</p> |
| (2B) | $mot_a [px] = 0$ |                                                                                                                                                                                                                                                                                                                                                                                                                                                                                                                                                                                                                                                                                                                                                                                                                                                                                                                                                                                                                                                                                        |

### Equations 3. Measurement of the framewise change of pixel luminance and its normalization

|      |                                                                                                      |                                                                                                                                                                                                                                                                                                                                                                                                                                                                                                                                                                                                                                                                                                                                                                                                                                                                                                                                                                                                                                                                                                                             |
|------|------------------------------------------------------------------------------------------------------|-----------------------------------------------------------------------------------------------------------------------------------------------------------------------------------------------------------------------------------------------------------------------------------------------------------------------------------------------------------------------------------------------------------------------------------------------------------------------------------------------------------------------------------------------------------------------------------------------------------------------------------------------------------------------------------------------------------------------------------------------------------------------------------------------------------------------------------------------------------------------------------------------------------------------------------------------------------------------------------------------------------------------------------------------------------------------------------------------------------------------------|
| (3A) | $motA [mfa, sz_j, t_i] = \sum_{k=1}^{10000} (motA_{px} [k])$                                         | <p>Definition of the motion activity in relation to the bee collective in a surveillance zone.</p> <p>With <math>motA</math>, motion activity (Eq#3A); <math>mfa</math>, episode of the MFA activity; <math>sz_j</math>, the selected surveillance zone (<math>j = 1-5</math>) with the size of the square of <math>100 px * 100 px = 10\,000 [px]</math> in the originally recorded frame; a single pixel is denoted here as '<math>px</math>' concerning a length, or denoted as '<math>[px]</math>' concerning an area; <math>motA_{px} [k]</math>, the value assigned in Eq#3A to the area <math>k</math> which is equivalent to the number <math>k</math> of the respective pixels confirming motion activity (<math>motA_{px} [k] = 1</math>) or motionlessness (<math>motA_{px} [k] = 0</math>) as defined in Eq#2 (with <math>k_i = 10\,000 - k_0</math>). For each frame <math>f_i</math> at the timepoint <math>t_i</math>, the motion activity <math>motA[t_i]</math> is quantified for each surveillance zone <math>sz_j</math> by summing up the motion-active pixels <math>[px]</math> contained therein.</p> |
| (3B) | $rel_{motS} [mfa, sz_k] = \sum_{j=f_{start}}^{j=f_{end}} (motA [j]) / n_{ff}[sess_{exp}]$            | <p>Normalisation of the motion activity in relation to the length of experimental session.</p> <p><math>f_{start}, f_{end}</math> are the frames at the starting and ending time (<math>t_{start}, t_{end}</math>) of the respective experimental session <math>sess_{exp}</math>; <math>n_{ff}[sess_{exp}]</math> is the number of frames of the respective session. Therefore, <math>rel_{motS}</math> (Eq#3B) is the relative expression of the sum of motion activity per frame throughout an entire experimental session (<math>sess_{exp}</math>). This normalization takes into account the fact that the motion activity in the test sessions can only be compared if the different lengths of the periods are considered.</p>                                                                                                                                                                                                                                                                                                                                                                                      |
| (3C) | $max_{rel_{motS}} =$ $= MAX (rel_{motS} [mfa, sz_{1-5}, sess_{exp} = 1.. max_{sess}])$               | <p>Assessment of the maximal motion activity in the entire episode.</p> <p>The total maximum <math>max_{rel_{motS}}</math> (Eq#3C) of the values <math>rel_{motS}</math> (Eq#3B) is determined from all surveillance zones (<math>sz_{1-5}</math>) and from all experimental sessions (<math>sess_{exp}</math>).</p>                                                                                                                                                                                                                                                                                                                                                                                                                                                                                                                                                                                                                                                                                                                                                                                                        |
| (3D) | $rel_{2_{motS}} [mfa, sz_k, sess_{exp}] =$ $= rel_{motS} [mfa, sz_k, sess_{exp}] / max_{rel_{motS}}$ | <p>Normalisation of the motion activity in the entire episode due to the maximal motion strength.</p> <p>The value <math>rel_{2_{motS}}</math> is calculated by its normalization with the total maximum (Eq#3C) and thus provides the relative image-based motion activity per experimental session <math>sess_{exp}</math> in one of the five surveillance zones (<math>sz_k</math>) between the limits of 0 and 1 (Eq#3D).</p>                                                                                                                                                                                                                                                                                                                                                                                                                                                                                                                                                                                                                                                                                           |
| (3E) | $min_{motA} = MIN (motA)$                                                                            | <p>Normalisation of the motion activity in the entire episode due to the minimal and maximal motion strength.</p> <p>The motion values <math>motA</math> or the like are normalized with Eq#3G to the value <math>motA^*</math> between 0 and 1 by considering the maximum and minimum motion values (Eq#3E,F) in the entire selected episode. Here, the minimum <math>motA</math> values (Eq#3A) are set to 0, and the maximum <math>motA</math> values (Eq#3A) are set to 1. This normalization is important in order to compare the range of motion in different episodes. For various reasons, this range is episode-specific, which could hardly be an attribute to be evaluated</p>                                                                                                                                                                                                                                                                                                                                                                                                                                   |
| (3F) | $max_{motA} = MAX (motA)$                                                                            |                                                                                                                                                                                                                                                                                                                                                                                                                                                                                                                                                                                                                                                                                                                                                                                                                                                                                                                                                                                                                                                                                                                             |
| (3G) | $motA^* = 1 - (max_{motA} - motA) / (max_{motA} - min_{motA})$                                       |                                                                                                                                                                                                                                                                                                                                                                                                                                                                                                                                                                                                                                                                                                                                                                                                                                                                                                                                                                                                                                                                                                                             |

#### Equations 4. Assessment of the histogram-based *motion* spectrum

|      |                                                                                                                                                                         |                                                                                                                                                                                                                                                                                                                                                                                                                                                                                                                                                                                                                                                                                                                                                                                                                              |
|------|-------------------------------------------------------------------------------------------------------------------------------------------------------------------------|------------------------------------------------------------------------------------------------------------------------------------------------------------------------------------------------------------------------------------------------------------------------------------------------------------------------------------------------------------------------------------------------------------------------------------------------------------------------------------------------------------------------------------------------------------------------------------------------------------------------------------------------------------------------------------------------------------------------------------------------------------------------------------------------------------------------------|
| (4A) | $\text{Increment}_{50} =$ $= (\text{LOG}_{10} (\max_{\text{motA}} [\text{mfa}] - \min_{\text{motA}} [\text{mfa}])) / 50$                                                | <p><i>Definition of 50 steps in motion strength in histogram-based motion spectra.</i></p> <p>The <i>motion</i> values <math>\text{motA}</math> or the like are normalized with Eq#3G to the value <math>\text{motA}^*</math> between 0 and 1 by considering the maximum and minimum <i>motion</i> values (Eq#3E,F) in the entire selected episode. Here, the minimum <math>\text{motA}</math> values (Eq#3A,E) are set to 0, and the maximum <math>\text{motA}</math> values (Eq#3A,F) are set to 1.</p>                                                                                                                                                                                                                                                                                                                    |
| (4B) | $\text{LLLOG}_{\text{mot}} [I_h] =$ $= \text{LOG}_{10} (\min_{\text{motA}} [\text{mfa}]) + \text{Increment}_{50} * (I_h - 1)$                                           | <p><i>Definition of each interval of motion strength for the motion spectrum.</i></p> <p>Therefore, in any case the general lower limit [LL] of the entire distribution of the <i>motion</i> activity of the selected episode is set in the paper mathematically as 0 [px], equal to zero <i>motion</i> activity (according to Eq#3A,E) per surveillance zone (<math>\mathcal{S}_{\mathcal{Z}_{1-5}}</math>); the general upper limit [UL] of the range of <i>motion</i> strength is assessed as the maximal value of <i>motion</i> activity (according to Eq#3F) determined in all five surveillance zones (<math>\mathcal{S}_{\mathcal{Z}_{1-5}}</math>) per <i>mfa</i> episode (Eq#4A). The respective lower and upper limits of the 50 histogram intervals <math>I_h</math> are calculated according to the Eq#4B,C.</p> |
| (4C) | $\text{ULLOG}_{\text{mot}} [I_h] = \text{LLLOG}_{\text{mot}} [I_h] + \text{Increment}_{50}$                                                                             |                                                                                                                                                                                                                                                                                                                                                                                                                                                                                                                                                                                                                                                                                                                                                                                                                              |
| (4D) | $\text{LLLOG}_{\text{mot}} [I_h] < \text{LOG}_{10} (\text{motA} [f_i, \text{mfa}]) < \text{ULLOG} [I_h]$                                                                | <p><i>Sorting algorithm for motion strength values in relation to the motion spectrum.</i></p> <p>A single case of <i>motion</i> event <math>\text{motA}</math> (Eq#3A) at the time <math>t_i</math> concerning the captured image <math>f_i</math> refers to the number of <i>motion</i>-active pixels per surveillance zone and this value is then as its logarithmic value <math>\text{LOG}_{10} (\text{motA})</math> sorted according to Eq#4D into the <i>motion</i> strength category <math>I_h</math>.</p>                                                                                                                                                                                                                                                                                                            |
| (4E) | $\text{rel}_{1 \text{ motA}} [I_h] = n_{ff} [I_h] / N_{ff} [\text{sess}_{\text{exp}}]$                                                                                  | <p><i>Normalizing the motion strength intervals in relation to the number of frames per experimental session.</i></p> <p>For each histogram interval <math>I_h</math>, this sorting process yields a value indicating the number of cases concerning this <i>motion</i> strength interval (<math>n_{ff} [I_h]</math>), each of these cases referring to a single image. This number must be normalized to the length of the corresponding experimental session for comparability with other sessions (Eq#4C). This length of session is quantified with the number of frames involved <math>N_{ff}</math>. The result <math>\text{rel}_{1 \text{ motA}}</math> (Eq#4E) presents itself as a value for the <i>motion</i> strength in a relative term.</p>                                                                     |
| (4F) | $\max \text{rel}_{1 \text{ motA}} =$ $= \text{MAX} (\text{rel}_{1 \text{ motA}} [I_h = 1 \dots 50; \text{sess}_{\text{exp}} = 1 \dots \max\_session; \text{sz}_{1-5}])$ | <p><i>Normalisation of the motion strength intervals in relation to the maximum motion strength value of the episode.</i></p> <p>Lastly the maximum <math>\text{rel}_{1 \text{ motA}}</math> value (Eq#4F) was assessed regarding all experimental sessions (e.g. <math>\text{sess}_{\text{exp}} = 1..17</math> for <math>\text{mfa}_1</math>), and for all nest areas (<math>\mathcal{S}_{\mathcal{Z}_{1-5}}</math>), but separately for each of the episodes <math>\text{mfa}_{1-3}</math>. This value was used to normalize the <math>\text{rel}_{1 \text{ motA}}</math> data (Eq#4E) to range between 0 and 1 (<math>\text{rel}_{2 \text{ motA}} [I_h]</math>: Eq#4G) for easier comparison.</p>                                                                                                                         |
| (4G) | $\text{rel}_{2 \text{ motA}} [I_h] = \text{rel}_{1 \text{ motA}} [I_h] / \max \text{rel}_{1 \text{ motA}}$                                                              |                                                                                                                                                                                                                                                                                                                                                                                                                                                                                                                                                                                                                                                                                                                                                                                                                              |

### Equations 5. Assessment of the size of the tail areas of the histogram-based *motion* spectrum

|                      |                                                                                                                 |                                                                                                                                                                                                                                                                                                                                                                                                                                                                                                                                                                                                                                                                                                                                                                                                                                                 |
|----------------------|-----------------------------------------------------------------------------------------------------------------|-------------------------------------------------------------------------------------------------------------------------------------------------------------------------------------------------------------------------------------------------------------------------------------------------------------------------------------------------------------------------------------------------------------------------------------------------------------------------------------------------------------------------------------------------------------------------------------------------------------------------------------------------------------------------------------------------------------------------------------------------------------------------------------------------------------------------------------------------|
| (5A)<br>(5B)         | $n_i = rel2_{motA} [I_h = i]$ $n_k = \text{MAX} (n_i) \text{ (for } n_1, \dots, n_k, \dots, n_{50})$            | <p><i>Determination of the position of the max motion strength in the 50 intervals of the histogram-based motion spectrum.</i></p> <p>In each histogram-based <i>motion</i> spectrum created with the normalized data (Eq#4G), the interval <math>k</math> was determined which has the maximum of the cases (Eq#5A,B). This is repeated for all the <i>motion</i> spectra of the entire series of sessions (<math>j = 1</math> to <math>max_{sess_{exp}}</math>) of each episode (<math>m[a_{1-3}]</math>) selected, and separately for all five surveillance zones (<math>s_{z1-5}</math>).</p>                                                                                                                                                                                                                                               |
| (5C)                 | $k [P_d]_j = (k [nP_d]_{j-1} + k [nP_d]_{j+1}) / 2$                                                             | <p><i>The pragmatic way to decide about the position of the max motion strength in a bimodal histogram-based motion spectrum.</i></p> <p>The <math>P_d</math> -sessions in the semi-quiescent state clearly show bimodal distributions due to the initiated shimmering activity. Therefore, a possible maximum of the motion-profile (as suggested in Eq#5B) for a given <math>[P_d]_j</math> session can only be determined pragmatically. For this purpose, the mean value of those positions was used for which the two <math>nP_d</math> sessions before and after the selected <math>P_d</math> session (<math>[nP_d]_{j-1}</math>, <math>[nP_d]_{j+1}</math>; Eq#5C) showed their maxima (Eq#5B) in their <i>motion</i> spectra.</p>                                                                                                      |
| (5D)<br>(5E)<br>(5F) | $UL = k + 5; LL = k - 5$ $uTa = \sum_{i=UL}^{50} (rel2_{motA} [i])$ $lTa = \sum_{i=1}^{i=LL} (rel2_{motA} [i])$ | <p><i>Determination of the motion strength summed up in the left-sided and right-sided tails in the histogram-based motion spectrum.</i></p> <p>On both sides of the maximum in the <i>motion</i> spectrum (at the position <math>I_h = k</math>), the tails of the <i>motion</i> spectra are set with the respective distance of five intervals of the <i>motion</i> strength (where the interval <math>I_h</math> is defined logarithmically according to Eq#4D). Thus the left tail of the spectrum contains the <math>rel2_{motA} [I_h]</math> values (Eq#4G) in the interval range <math>[I_h = 1 \dots LL]</math>, and the right tail in the interval range <math>[I_h = UL \dots 50]</math> (Eq#5D-F, see also [49]). The characteristic values of both tail ranges are then determined by the respective sums according to Eq#5E,F.</p> |
| (5G)                 | $q_s = uTa / lTa$                                                                                               | <p><i>Determination of the skewness of motion spectrum.</i></p> <p>Finally, the index <math>q_s</math> (Eq#5G) is used as a measure of <i>skewness</i> of the <i>motion</i> spectrum. This relation does not require further normalization, but on the other hand it is also independent of the position of the distribution on the spectral scale of <i>motion</i> strength (see also [49]).</p>                                                                                                                                                                                                                                                                                                                                                                                                                                               |

## Equations 6. Temperature values of the individual pixels per surveillance zone

|       |                                                                                                                                |                                                                                                                                                                                                                                                                                                                                                                                                                                                                                                                                                                                                                                                                                                             |
|-------|--------------------------------------------------------------------------------------------------------------------------------|-------------------------------------------------------------------------------------------------------------------------------------------------------------------------------------------------------------------------------------------------------------------------------------------------------------------------------------------------------------------------------------------------------------------------------------------------------------------------------------------------------------------------------------------------------------------------------------------------------------------------------------------------------------------------------------------------------------|
| (6A)  | $n_{[px]}(sz_i)$ defined as<br>$sz_1: 2\,399 [px]; sz_2: 2\,399 [px]; sz_3: 2\,549 [px]; sz_4: 2\,861 [px]; sz_5: 2\,549 [px]$ | <p><i>Definition of the size of surveillance zones in the IR images.</i></p> <p>The geometry and the associated number of individual pixel areas <math>[px]</math> for each of the seven surveillance zones defined for the IR images (<math>sz_{1-7}</math>; Eq#6A; see Fig. 3) were estimated according to the video images [49] and adapted to the resolution of the IR images (320 x 240 px).</p>                                                                                                                                                                                                                                                                                                       |
| (6B)  | $heatX[sz_i, t_{exp}] = \sum_{ipx=1}^{n[px]} (T_{ipx}[sz_i, t_{exp}] / n[px])$                                                 | <p><i>Calculation of the relative heat per pixel area in a surveillance zone in an IR image.</i></p> <p>The mean temperature (<math>_{heat}X</math>; Eq#6B) was calculated from the individual pixel values of the square areas defined in the IR image using Flir software; <math>t_{exp}</math>, experimental time defined for the selected image; <math>n[px]</math>, number of pixel areas <math>[px]</math> referring to the selected surveillance zone <math>sz_i</math> in the IR image; <math>T_{ipx}</math>, temperature of the individual pixel area <math>[px]_{ipx}</math>; <math>_{heat}X</math>, arithmetic mean of the temperature of all pixel areas of the selected surveillance zone.</p> |
| (6cC) | $heatX_{19}[sz_i, f[t_{exp}]] = \sum_{iff=-9}^{+9} heatX[sz_i, f[t_{exp}], iff] / 19$                                          | <p><i>Smoothing of the relative heat per pixel area in a surveillance zone in a sequence of IR images.</i></p> <p>In the IR image sequence, the temperature of the selected surveillance zone was smoothed for each frame <math>f[t_{exp}]</math> using a moving average (<math>X_{19}</math> with <math>iff = 1..19</math>). For this purpose, the mean value <math>_{heat}X_{19}</math> was determined using the individual values (Eq#6B) of 9 leading and 9 trailing images (Eq#6cC).</p>                                                                                                                                                                                                               |
| (6D)  | $min_{heatX_{19}} = \text{MIN}(_{heatX_{19}}),$                                                                                | <p><i>Normalisation of the relative heat per pixel area in a surveillance zone in an IR image between min and max values.</i></p> <p>The <i>heat</i> values <math>_{heat}X</math> or the like are normalized with Eq#6F to the value <math>_{heat}X_{19}^*</math> between 0 and 1 by taking into account the maximum and minimum <i>motion</i> values (Eq#6D,E) in the entire selected episode.</p>                                                                                                                                                                                                                                                                                                         |
| (6E)  | $max_{heatX_{19}} = \text{MAX}(_{heatX_{19}})$                                                                                 |                                                                                                                                                                                                                                                                                                                                                                                                                                                                                                                                                                                                                                                                                                             |
| (6F)  | $_{heatX_{19}}^* = 1 - (max_{heatX_{19}} - _{heatX_{19}}) / (max_{heatX_{19}} - min_{heatX_{19}})$                             |                                                                                                                                                                                                                                                                                                                                                                                                                                                                                                                                                                                                                                                                                                             |

## Equations 7. Determination of max *heat* and its time point in a pre-MFA *heat* pulse

|      |                                                                                                                                                                                                  |                                                                                                                                                                                                                                                                                                                                                                                                                                                                                                                                     |
|------|--------------------------------------------------------------------------------------------------------------------------------------------------------------------------------------------------|-------------------------------------------------------------------------------------------------------------------------------------------------------------------------------------------------------------------------------------------------------------------------------------------------------------------------------------------------------------------------------------------------------------------------------------------------------------------------------------------------------------------------------------|
| (7A) | $H_{lth} = H_{max} - 0.001 * H_{max}$                                                                                                                                                            | <p><i>Defining the lower threshold value in the presumptive preMFA beat pulse.</i></p> <p>To determine the two parameters of the preMFA <i>beat</i> pulse, the time value of its maximum height (Eq#7D) and the time value of its maximum initial rise (Eq#7I) to its maximum height, a measurement range between the absolute height (<math>H_{max}</math>) and a <i>lower threshold value</i> (<math>H_{lth}</math>) is defined within the first part of the bipolar shaped pulse according to Eq#7A (see also Fig. S2 A1.5).</p> |
| (7B) | For all $T_{it}$ with $H_{lth} \leq T_{it} \leq H_{max}$<br>$t [T_{it}]$ is determined with $n_{all\_it} = n [t_{Tit}]$                                                                          | <p><i>Determination of the beat maximum in the presumptive preMFA beat pulse.</i></p> <p>Subsequently, all <i>beat</i> values <math>T_{it}</math> in this selected time interval (with <math>i_t</math> as the number of the actual time value) were determined with their time values <math>t [T_{it}]</math>, corresponding to Eq#7B. This number of all respective time points (which conform to the selected frames) is determined with <math>n_{all\_it}</math>.</p>                                                           |
| (7C) | $H'_{max} = \sum_{it=1}^{n_{all\_it}} T_{it} [sz_j] / n_{all\_it}$                                                                                                                               | <p>The mean value of those frames whose <i>beat</i> values lie within the upper (<math>H_{max}</math>) and lower (<math>H_{lth}</math>) threshold values is taken as the <i>beat</i> maximum (<math>H'_{max}</math>; Eq#7B,C) in the first part of the bipolar pre-MFA impulse of the surveillance zone <math>sz_j</math>.</p>                                                                                                                                                                                                      |
| (7D) | $t [H'_{max}] = \sum_{it=1}^{n_{all\_it}} (t [T_{it}] [sz_j] / n_{all\_it})$                                                                                                                     | <p><i>Determination of the time value of the beat maximum in the presumptive preMFA beat pulse.</i></p> <p>Similarly, the temporal value of this maximum <math>H'_{max}</math> is determined by taking all the time values of the <i>beat</i> data that lie within this amplitude range in the given time interval of the bipolar <i>beat</i> pulse according to Eq#7D.</p>                                                                                                                                                         |
| (7E) | $f_{start} = \text{var} (f[1.25 \text{ min}] \text{ to } f[2.0 \text{ min}]) \text{ exp time}$<br>with $f[2.0 \text{ min}] = 3*60 \text{ s} * 0.75 = ff 135$ (for the rate of IR-frames = 3ff/s. | <p><i>Definition of start and end frames in the presumptive preMFA beat pulse.</i></p> <p>The start time of the analysis (<math>f_{start}</math>) ranges from the beginning of the pre-MFA pulse in experimental time to the first half of this bipolar pulse of 2 min exposure time, which corresponds in the episode <math>mf_{a1}</math> to 135 frames (Eq#7E).</p>                                                                                                                                                              |
| (7F) | $\Delta ff = \text{var} (ff 50-90); dt = t (\Delta ff)$                                                                                                                                          | <p><i>Definition of <math>\Delta ff</math> as a probe for determination of max <i>beat</i> increase in the presumptive preMFA beat pulse.</i></p> <p>The time step <math>dt</math>, in which later on the maximum slope <math>dH / dt</math> (Eq#7I) is calculated for all surveillance zones in the episode <math>mf_{a1}</math> (see abscissa in Fig. S2 B), ranges from <math>f 50</math> to <math>f 90</math>, which corresponds to a time interval of 17 - 30 s (Eq#7F; Fig. S2 C).</p>                                        |

|      |                                                                                           |                                                                                                                                                                                                                                                                                                                                                                                                                                                                                                                                                                 |
|------|-------------------------------------------------------------------------------------------|-----------------------------------------------------------------------------------------------------------------------------------------------------------------------------------------------------------------------------------------------------------------------------------------------------------------------------------------------------------------------------------------------------------------------------------------------------------------------------------------------------------------------------------------------------------------|
| (7G) | $dH = H_1 - H_0$ with<br>$H_1 = H [f_{\text{start}} + \Delta ff]$ ; $H_0 = H [\Delta ff]$ | <p><i>Scanning of beat values with the <math>\Delta ff</math> probe to determine the max beat increase in the presumptive preMFA beat pulse.</i></p> <p>The <i>beat</i> difference (<math>dH</math>) is defined on the reference <i>beat</i> (<math>H_0</math>) with the lower time value (Eq#7G) and the higher <i>beat</i> value (<math>H_1</math>) at the end of the selected time step <math>dt</math>. To do this, the entire selected period of 135 frames (Eq#7E) is scanned by increasing the respective start frame <math>f_{\text{start}}</math>.</p> |
| (7H) | $\max dH / dt = \text{MAX } dH / \Delta ff$                                               | <p><i>Determination of the max beat increase in the presumptive preMFA beat pulse using the time interval <math>\Delta ff</math> for scanning.</i></p> <p>By selecting var (<math>ff</math> 50-85) which is var (<math>f</math> [1.25 min+17 s] to <math>f</math> [1.25 min+30 s ]) exp time, the maximum inclination (<math>\text{MAX } dH / dt</math>) is determined (Eq#7H; Fig. S2 C).</p>                                                                                                                                                                  |
| (7I) | $t [\text{MAX } dH / dt ] = t (f_{\text{start}} (\text{MAX } dH / dt [\Delta ff]) )$      | <p><i>Determination of the time value of the max beat increase in the presumptive preMFA beat pulse.</i></p> <p>The time value <math>t [\text{MAX } dH / dt]</math>, which is linked to the maximum <i>beat</i> increase, is then equated with the time value of <math>f_{\text{start}}</math> at the selected time step of <math>\Delta ff</math> (Eq#7I).</p>                                                                                                                                                                                                 |

## Equations 8. Derivation of the benchmarks for *heat-motion* coupling

|      |                                                                                                                                                                                                                                                                                                                                                                                                                                                                                                                                                                                                                                                                                                                                                                                                                                                                                                                                                                                                                                                                                                                                                                                           |                                                                                                                                                                                                                                                                                                                                                                                                                                                                                                                                                                                                                                                                                                                                                                                                                                                                                                                                                                                                                                                                                                                                                                                                                                                                                                                                                                                                                                                                                                                                                                                                                                                                                                                                                                                                                                                                                                                                                                                                                                                                                                                                                                                                                                                                                                          |
|------|-------------------------------------------------------------------------------------------------------------------------------------------------------------------------------------------------------------------------------------------------------------------------------------------------------------------------------------------------------------------------------------------------------------------------------------------------------------------------------------------------------------------------------------------------------------------------------------------------------------------------------------------------------------------------------------------------------------------------------------------------------------------------------------------------------------------------------------------------------------------------------------------------------------------------------------------------------------------------------------------------------------------------------------------------------------------------------------------------------------------------------------------------------------------------------------------|----------------------------------------------------------------------------------------------------------------------------------------------------------------------------------------------------------------------------------------------------------------------------------------------------------------------------------------------------------------------------------------------------------------------------------------------------------------------------------------------------------------------------------------------------------------------------------------------------------------------------------------------------------------------------------------------------------------------------------------------------------------------------------------------------------------------------------------------------------------------------------------------------------------------------------------------------------------------------------------------------------------------------------------------------------------------------------------------------------------------------------------------------------------------------------------------------------------------------------------------------------------------------------------------------------------------------------------------------------------------------------------------------------------------------------------------------------------------------------------------------------------------------------------------------------------------------------------------------------------------------------------------------------------------------------------------------------------------------------------------------------------------------------------------------------------------------------------------------------------------------------------------------------------------------------------------------------------------------------------------------------------------------------------------------------------------------------------------------------------------------------------------------------------------------------------------------------------------------------------------------------------------------------------------------------|
| (8A) | <p><i>heat</i> data: <math>_{\text{heat}}X_{19} (sz_i, f [t_i])</math></p> <p><i>motion</i> data: <math>_{\text{mot}}A (mfa_k, sz_j, f [t_i])</math></p>                                                                                                                                                                                                                                                                                                                                                                                                                                                                                                                                                                                                                                                                                                                                                                                                                                                                                                                                                                                                                                  | <p><i>Definition of the primary elements for calculating the magnitude of the heat-motion coupling.</i></p> <p>The temperature values <math>_{\text{heat}}X_{19}</math> (Eq#6C) and the <i>motion</i> data <math>_{\text{mot}}A</math> (Eq#3A) (see Fig. 4 for survey of both parameters) are the primaries (Eq#8a) for calculation the magnitudes of <i>heat-motion</i> coupling. They are specified for the selected episode (<math>mfa_{1-3}</math>), for the respective surveillance zones (<math>sz_{j=1..5}</math>) at the relevant time of the experiment (<math>f[t_i]</math> with <math>i = 1..&gt; ff\ 4\ 000</math>, and <math>\Delta t = t [f_i] - t [f_{i-1}] = 0.3</math> s.</p>                                                                                                                                                                                                                                                                                                                                                                                                                                                                                                                                                                                                                                                                                                                                                                                                                                                                                                                                                                                                                                                                                                                                                                                                                                                                                                                                                                                                                                                                                                                                                                                                           |
| (8B) | <p><math>lag_{\text{pos}}</math> condition: <math>[t_{\text{heat}} &lt; t_{\text{motion}}]; lag_{\text{pos}} [motion] \geq 0</math></p> <p><math>lag_{\text{pos}} [motion] = 0</math></p> <p><math>trial_0 [lag_{\text{pos}}, heat]: f_{\text{start}} = f_{100} = 100; f_{\text{end}} = f_{\text{start}} + 50 = f_{150}</math></p> <p><math>trial_0 [lag_{\text{pos}}, motion]: f_{\text{start}} = f_{100} = 100; f_{\text{end}} = f_{\text{start}} + 50 = f_{150}</math></p> <p><math>lag_{\text{pos}} [motion] = +1</math></p> <p><math>trial_1 [lag_{\text{pos}}, heat]: f_{\text{start}} = f_{100} - (+1) = f_{99}; f_{\text{end}} = f_{\text{start}} + 50 = f_{149}</math></p> <p><math>trial_1 [lag_{\text{pos}}, motion]: f_{\text{start}} = f_{100} = 100; f_{\text{end}} = f_{\text{start}} + 50 = f_{150}</math></p> <p>...</p> <p><math>lag_{\text{pos}} [motion] = +49</math></p> <p><math>trial_{49} [lag_{\text{pos}}, heat]: f_{\text{start}} = f_{100} - 49 = f_{51}; f_{\text{end}} = f_{\text{start}} + 50 = f_{101}</math></p> <p><math>trial_{49} [lag_{\text{pos}}, motion]: f_{\text{start}} = f_{100}; f_{\text{end}} = f_{\text{start}} + 50 = f_{150}</math></p> | <p><i>Selection of the test sequence for the heat-motion coupling. Definition of data sets.</i></p> <p>The lag condition <math>[t_{\text{heat}} &lt; t_{\text{motion}}]</math> (Eq#8B) means, for the cross correlation of <i>heat</i> and <i>motion</i> data (Eq#8A) by the Pearson correlation coefficient (<math>pcc</math>), that the time point of <i>heat</i> measurement is before the time point of <i>motion</i> measurement (with the definition of <math>lag_{\text{pos}} [motion] \geq 0</math>). Here the <i>lag</i> of between <i>heat</i> and <i>motion</i> measurement is greater than zero.</p> <p>In Eq#8B, the single steps of the <math>lag_{\text{pos}}</math> algorithm are detailed. First, for <math>lag_{\text{pos}} [motion] = 0</math> means that the start and end times for the calculation of the Pearson correlation coefficient (<math>pcc</math>) are the same for <i>heat</i> and <i>motion</i> domain. They range from <math>f_{100}</math> to <math>f_{150}</math> in each of the experimental sessions (<math>P_d, nP_d</math>). A single <i>trial</i> comprises therefore a single run to evaluate a <math>pcc</math> value.</p> <p>Second, for <math>lag_{\text{pos}} [motion] = +1</math> means that the start and end times for the calculation of the Pearson correlation coefficient (<math>pcc</math>) are for the <i>heat</i> assessment by one frame earlier than for that of the <i>motion</i> domain. The <i>heat</i> domain ranges therefore from <math>f_{100-1} = f_{99}</math> to <math>f_{150-1} = f_{149}</math> in each of the experimental sessions (<math>P_d, nP_d</math>), while the <i>motion</i> domain remains frozen from <math>f_{100}</math> to <math>f_{150}</math>.</p> <p>Third, for <math>lag_{\text{pos}} [motion] = +49</math> means that the start and end times for the calculation of the Pearson correlation coefficient (<math>pcc</math>) are for the <i>heat</i> domain by 49 frames earlier than for the <i>motion</i> domain. The <i>heat</i> domain ranges therefore from <math>f_{100-49} = f_{51}</math> to <math>f_{150-49} = f_{101}</math> in each of the experimental sessions (<math>P_d, nP_d</math>), while the <i>motion</i> domain remains still frozen at <math>f_{100}</math> to <math>f_{150}</math>.</p> |



|      |                                                                                                                                                                                                                                                                                                                                                                                                                                                                                                                                                                                                                                                                                                                                                                                  |                                                                                                                                                                                                                                                                                                                                                                                                                                                                                                                                                                                                                                                                                                                                                                                                                                                                                                                                                                                                                                                                                                                                                                                                                                                                                                                                                                                                                                                                                                                                                                                                                                                                                                                                                                                                                                                                                                                                                                                                                                                                                                                                                                                                                                                                                   |
|------|----------------------------------------------------------------------------------------------------------------------------------------------------------------------------------------------------------------------------------------------------------------------------------------------------------------------------------------------------------------------------------------------------------------------------------------------------------------------------------------------------------------------------------------------------------------------------------------------------------------------------------------------------------------------------------------------------------------------------------------------------------------------------------|-----------------------------------------------------------------------------------------------------------------------------------------------------------------------------------------------------------------------------------------------------------------------------------------------------------------------------------------------------------------------------------------------------------------------------------------------------------------------------------------------------------------------------------------------------------------------------------------------------------------------------------------------------------------------------------------------------------------------------------------------------------------------------------------------------------------------------------------------------------------------------------------------------------------------------------------------------------------------------------------------------------------------------------------------------------------------------------------------------------------------------------------------------------------------------------------------------------------------------------------------------------------------------------------------------------------------------------------------------------------------------------------------------------------------------------------------------------------------------------------------------------------------------------------------------------------------------------------------------------------------------------------------------------------------------------------------------------------------------------------------------------------------------------------------------------------------------------------------------------------------------------------------------------------------------------------------------------------------------------------------------------------------------------------------------------------------------------------------------------------------------------------------------------------------------------------------------------------------------------------------------------------------------------|
| (8C) | $k = lag_{pos}[motion]$<br>$trial_k[k, heat]: f_{start}[k, heat] = f_{100} - k; f_{end}[k, heat] = f_{start}[k, heat] + 50$<br>$trial_k[k, motion]: f_{start}[k, motion] = f_{100}; f_{end}[k, motion] = f_{start}[k, motion] + 50$<br>$pcc(trial_k[k, heat], trial_k[k, motion])$                                                                                                                                                                                                                                                                                                                                                                                                                                                                                               | <p>Setting the Pearson correlation coefficient for the heat-motion coupling. Algorithm of cross correlation between heat and motion for <math>lag_{pos}[motion]</math></p> <p>The general algorithm of the assessment of the <math>pcc</math> value for the <math>lag_{pos}[motion]</math> condition is here (Eq#8cC) summarized.</p>                                                                                                                                                                                                                                                                                                                                                                                                                                                                                                                                                                                                                                                                                                                                                                                                                                                                                                                                                                                                                                                                                                                                                                                                                                                                                                                                                                                                                                                                                                                                                                                                                                                                                                                                                                                                                                                                                                                                             |
| (8D) | $lag_{neg}$ condition: $[t_{heat} > t_{motion}]; lag_{neg}[motion] \leq 0$<br>$lag_{neg}[motion] = 0$<br>$trial_0[lag_{neg}, heat]: f_{start} = f_{100} = 100; f_{end} = f_{start} + 50 = f_{150}$<br>$trial_0[lag_{neg}, motion]: f_{start} = f_{100} = 100; f_{end} = f_{start} + 50 = f_{150}$<br>$lag_{neg}[motion] = -1$<br>$trial_1[lag_{neg}, heat]: f_{start} = f_{100} - (-1) = f_{101}; f_{end} = f_{start} + 50 = f_{151}$<br>$trial_1[lag_{neg}, motion]: f_{start} = f_{100} = 100; f_{end} = f_{start} + 50 = f_{150}$<br>...<br>$lag_{neg}[motion] = -49$<br>$trial_1[lag_{neg}, heat]: f_{start} = f_{100} - (-49) = f_{149}; f_{end} = f_{start} + 50 = f_{199}$<br>$trial_1[lag_{neg}, motion]: f_{start} = f_{100} = 100; f_{end} = f_{start} + 50 = f_{150}$ | <p>Selection of the test sequence for the motion-beat coupling. Definition of data sets.</p> <p>Similarly (regarding to Eq#8B), the lag condition <math>[t_{heat} &gt; t_{motion}]</math> (Eq#8D) means for the cross correlation of <i>beat</i> and <i>motion</i> data (Eq#8A) by the Pearson correlation coefficient (<math>pcc</math>) that the time point of <i>beat</i> measurement is after the time point of <i>motion</i> measurement (with the definition of <math>lag_{neg}[motion] \leq 0</math>). Here, the lag between <i>beat</i> and <i>motion</i> measurement is less than zero.</p> <p>In Eq#8D, the single steps of the <math>lag_{pos}</math> algorithm are detailed. First, for <math>lag_{neg}[motion] = 0</math> means that the start and end times for the calculation of the Pearson correlation coefficient (<math>pcc</math>) are the same for <i>beat</i> and <i>motion</i> domain. They range from <math>f_{100}</math> to <math>f_{150}</math> in each of the experimental sessions (<math>P_d, nP_d</math>). A single <i>trial</i> comprises therefore a single run to evaluate a <math>pcc</math> value.</p> <p>Second, for <math>lag_{neg}[motion] = -1</math> means that the start and end times for the calculation of the Pearson correlation coefficient (<math>pcc</math>) are for the <i>beat</i> assessment by one frame later than for that of the <i>motion</i> domain. The <i>beat</i> domain ranges therefore from <math>f_{100} - (-1) = f_{101}</math> to <math>f_{150} - (-1) = f_{151}</math> in each of the experimental sessions (<math>P_d, nP_d</math>), while the <i>motion</i> domain remains frozen from <math>f_{100}</math> to <math>f_{150}</math>.</p> <p>Third, for <math>lag_{neg}[motion] = -49</math> means that the start and end times for the calculation of the Pearson correlation coefficient (<math>pcc</math>) are for the <i>beat</i> domain by 49 frames earlier than for the <i>motion</i> domain. The <i>beat</i> domain ranges therefore from <math>f_{100} - (-49) = f_{149}</math> to <math>f_{150} - (-49) = f_{199}</math> in each of the experimental sessions (<math>P_d, nP_d</math>), while the <i>motion</i> domain remains still frozen at <math>f_{100}</math> to <math>f_{150}</math>.</p> |

|      |                                                                                                                                                                                                                                                                                                                                                                                                                                                                                                                                                                                                                                                                                                                                                                                                                  |                                                                                                                                                                                                                                                                                                                                                                                                                                                                                                                                                                                                                                                                                                                                                                                                                                                                                                                                                                                                                                                                                                                                                                                                              |
|------|------------------------------------------------------------------------------------------------------------------------------------------------------------------------------------------------------------------------------------------------------------------------------------------------------------------------------------------------------------------------------------------------------------------------------------------------------------------------------------------------------------------------------------------------------------------------------------------------------------------------------------------------------------------------------------------------------------------------------------------------------------------------------------------------------------------|--------------------------------------------------------------------------------------------------------------------------------------------------------------------------------------------------------------------------------------------------------------------------------------------------------------------------------------------------------------------------------------------------------------------------------------------------------------------------------------------------------------------------------------------------------------------------------------------------------------------------------------------------------------------------------------------------------------------------------------------------------------------------------------------------------------------------------------------------------------------------------------------------------------------------------------------------------------------------------------------------------------------------------------------------------------------------------------------------------------------------------------------------------------------------------------------------------------|
| (8E) | $l = lag_{neg} [motion]$ $trial_l [l, heat]: f_{start} [l, heat] = f_{100} - l; f_{end} [l, heat] = f_{start} [l, heat] + 50$ $trial_l [l, motion]: f_{start} [l, motion] = f_{100}; f_{end} [l, motion] = f_{start} [l, motion] + 50$ $pcc (trial_l [l, heat], trial_l [l, motion])$                                                                                                                                                                                                                                                                                                                                                                                                                                                                                                                            | <p>Setting the Pearson correlation coefficient for the motion-beat coupling. Algorithm of cross correlation between heat and motion for <math>lag_{neg} [motion]</math>.</p> <p>The general algorithm for the <math>lag_{neg} [motion]</math> condition is here (Eq#8E) summarized.</p> <p>For every run (<i>trial</i>) of each lag (<i>motion</i>) condition the Pearson correlation coefficient (<i>pcc</i>) is calculated according to the definition of the start and end frames in Eq#8C,E. These <i>pcc</i> values for both lag conditions are plotted against the lag values, as shown in Fig. S3 C. Only one of the lines in the diagram in Fig. S3 C serves as an example for this calculation step, e.g. the one in the red area with the parameter <math>f_{100}</math>.</p>                                                                                                                                                                                                                                                                                                                                                                                                                      |
| (8F) | <p>For both lag conditions: <math>lag_{neg} [motion] \leq 0</math>; <math>lag_{pos} [motion] \geq 0</math></p> $pcc (step, trial) = (step [heat, trial, lag], step [motion, trial, lag])$ <p>with</p> <p>step<sub>1</sub> comprises trials<sub>1-50</sub> (<math>lag_{neg,pos}</math>)</p> <p>heat   step<sub>1</sub>:</p> $f_{start} [trial_0] = f_{100+1} = f_{101}; f_{end} [trial_0] = f_{start} [trial_0] + 50 = f_{151}$ <p>.....</p> $f_{start} [trial_k] = f_{start} [k, heat] + 1 = f_{100 - k + 1}; f_{end} [trial_k] = f_{start} [trial_k] + 50$ <p>motion   step<sub>1</sub>:</p> $f_{start} [trial_0] = f_{100+1} = f_{101}; f_{end} [trial_0] = f_{start} [trial_0] + 50 = f_{151}$ <p>...</p> $f_{start} [trial_k] = f_{100+1} = f_{101}; f_{end} [trial_k] = f_{start} [trial_k] + 50 = f_{151}$ | <p>Definition of data sets for superimposing <i>pcc</i> values.</p> <p>In the next round, the <i>pcc</i> values are merged along several time steps. Here too, the number of 50 was chosen for the number of time steps in the sequence of frames. In Fig. S3 C, this type of evaluation of the <i>pcc</i> values (Eq#8F,G) is shown for 20 such time steps (the curves for these 20 time steps are colored from red to green).</p> <p>The point here is that the sequences of <i>pcc</i> values of a series of such 'steps', as shown in Fig. S3 C, can be averaged over fixed delays, as carried out in Fig. S3 D.</p> <p>These sequences begin on the abscissa with lag = 0 for the two conditions <math>lag_{neg} \leq 0</math> &amp; <math>lag_{pos} \geq 0</math>, and then include all further 'steps' that begin with incrementally (+i) increased start frames (<math>f_{start} = f_{100} \dots = f_{100+i}</math>).</p> <p>In this way, mean values and mean errors of the <i>pcc</i> values at fixed lag values can be determined for each lag unit (Fig. S3 D). This enables a statistical statement to be made about the coupling conditions between <i>heat</i> and <i>motion</i> (Eq#8H).</p> |

|      |                                                                                                                                                                                                                                                                                                                                                                                                                                                                                                                                                                                                                                                                                                                                                                                                                                                                                                                                                                                             |                                                                                                                                                                                                                                                                                                                                                                                                              |
|------|---------------------------------------------------------------------------------------------------------------------------------------------------------------------------------------------------------------------------------------------------------------------------------------------------------------------------------------------------------------------------------------------------------------------------------------------------------------------------------------------------------------------------------------------------------------------------------------------------------------------------------------------------------------------------------------------------------------------------------------------------------------------------------------------------------------------------------------------------------------------------------------------------------------------------------------------------------------------------------------------|--------------------------------------------------------------------------------------------------------------------------------------------------------------------------------------------------------------------------------------------------------------------------------------------------------------------------------------------------------------------------------------------------------------|
| (8G) | <p><math>k = lag_{\text{pos or neg}}</math></p> <p><math>n_{\text{step}} = 1 \text{ to } 50</math></p> <p><i>heat</i>   <math>\text{step}_n</math>:</p> $f_{\text{start}}[\text{trial}_0, \text{step}_n] = f_{100} + n = f_{100+n}; f_{\text{end}}[\text{trial}_0] =$ $= f_{\text{start}}[\text{trial}_0, \text{step}_n] + 50 = f_{150+n}$ <p>.....</p> $f_{\text{start}}[\text{trial}_k, \text{step}_n] = f_{\text{start}}[k, \text{heat}] + n = f_{100 - k + n};$ $f_{\text{end}}[\text{trial}_k, \text{step}_n] = f_{\text{start}}[\text{trial}_k, \text{step}_n] + 50$ <p><i>motion</i>   <math>\text{step}_1</math>:</p> $f_{\text{start}}[\text{trial}_0, \text{step}_n] = f_{100} + n = f_{100+n};$ $f_{\text{end}}[\text{trial}_0, \text{step}_n] = f_{\text{start}}[\text{trial}_0, \text{step}_n] + 50 = f_{150+n}$ <p>...</p> $f_{\text{start}}[\text{trial}_k] = f_{100} + n = f_{100+n};$ $f_{\text{end}}[\text{trial}_k] = f_{\text{start}}[\text{trial}_k] + 50 = f_{150+n}$ | <p><i>Algorithm of cross correlation between heat and motion for repetitions of pcc assessments in the number n of steps for both conditions of lags.</i></p> <p>The equations Eq#8G combine the ‘step’ algorithm with the ‘trial’ algorithm in Eq#8B-E for both lag conditions (pos or neg).</p>                                                                                                            |
| (8H) | <p><math>\text{mean}(pcc[\text{step}, \text{trial}], I_i)</math></p> <p><math>\text{mean error}(pcc[\text{step}, \text{trial}], I_i)</math></p>                                                                                                                                                                                                                                                                                                                                                                                                                                                                                                                                                                                                                                                                                                                                                                                                                                             | <p><i>Condensing algorithm</i></p> <p>To condense the <i>pcc</i> data, basic statistics (mean values and mean errors; Eq#8H) are assessed for every fixed lag (see Fig. S3 C,D) in two <i>bundles</i> (Eq#8I), from step 1 to step 10 (<math>I_1</math>), or from step 10 to step 25 (<math>I_2</math>). The version with <math>I_1</math> is displayed in the Fig. S3 D for both <i>lag</i> conditions.</p> |
| (8I) | <p>with two <i>bundles</i>: <math>I_1 = \text{step}_{1-10}</math> ; <math>I_2 = \text{step}_{10-25}</math></p>                                                                                                                                                                                                                                                                                                                                                                                                                                                                                                                                                                                                                                                                                                                                                                                                                                                                              |                                                                                                                                                                                                                                                                                                                                                                                                              |

|      |                                                                                                                                                                                                                      |                                                                                                                                                                                                                                                                                                                                                                                                                                                                                                                                                                                      |
|------|----------------------------------------------------------------------------------------------------------------------------------------------------------------------------------------------------------------------|--------------------------------------------------------------------------------------------------------------------------------------------------------------------------------------------------------------------------------------------------------------------------------------------------------------------------------------------------------------------------------------------------------------------------------------------------------------------------------------------------------------------------------------------------------------------------------------|
| (8J) | $lag_{neg} (motion) \leq 0$<br>$cum\ pcc (lag, I_i) =$<br>$= cum\ pcc (lag_{neg} - 1, I_i) + mean (pcc [step, trial], lag_{neg}, I_i)$                                                                               | <p><i>Cumulation algorithm</i></p> <p>In order to simplify the condensed data, the mean values of <math>pcc [step, trial]; I_i</math> (Eq#8H,I) are cumulated (Eq#8J,L), for each of the <math>lag</math> conditions and separated for the two <i>bundles</i> of <math>pcc</math> values (<math>I_1</math> and <math>I_2</math>) each from the <math>lag [motion] = 0</math> onwards.</p>                                                                                                                                                                                            |
| (8K) | $lag_{pos} (motion) \geq 0$<br>$cum\ pcc (lag_{pos}, I_i) =$<br>$= cum\ pcc (lag_{pos} + 1, I_i) + mean (pcc [step, trial], lag_{pos} + 1; I_i)$                                                                     |                                                                                                                                                                                                                                                                                                                                                                                                                                                                                                                                                                                      |
| (8L) | $max\ cum\ pcc = MAX (ABS(cum\ pcc (lags, I_j)) \text{ for } lags = \text{from } 0 \text{ to } \pm 49 \text{ and for both bundles } j = 1-2$<br><br>$rel\ cum\ pcc (lag, I_j) = cum\ pcc (lag, I_i) / max\ cum\ pcc$ | <p><i>Normalising the cumulated pcc data for all lags.</i></p> <p>In a next step, the cumulated data (<math>cum\ pcc (lag, I_i)</math>; Eq#8J,K) are normalized by the maximal absolute value (Eq#8L) forming relative cumulated data (<math>rel\ cum\ pcc</math>) according to Eq#8M in the range of <math>\pm 1</math>.</p>                                                                                                                                                                                                                                                        |
| (8N) |                                                                                                                                                                                                                      |                                                                                                                                                                                                                                                                                                                                                                                                                                                                                                                                                                                      |
| (8O) | $for\ lag\ condition: [t_{heat} < t_{motion}]; lag_{pos} [motion] \geq 0$<br>$lag_{pos} [i_t = 1-4] = +3s, +6s, +9s \text{ and } +12\ s$                                                                             | <p><i>Defining four discrete values of the cumulated pcc data.</i></p> <p>The last step was to select the data from these <math>pcc</math> curves at four discrete time delays for each of the positive and negative ranges (<math>\pm 3\ s, \pm 6\ s, \pm 9\ s</math> and <math>\pm 12\ s</math>) for both <math>lag</math> conditions (Eq#8B-E,N-P) according to Fig. S3 E and offer them as reference values to characterize the coupling between <i>heat</i> and <i>motion</i>. In Fig. S3 E only the <i>bundle</i> of <math>pcc</math> values <math>I_1</math> was applied.</p> |
| (8P) | $e.g. P [lag [i_t], I_1] = rel\ cum\ pcc (lag [i_t], I_1)$                                                                                                                                                           |                                                                                                                                                                                                                                                                                                                                                                                                                                                                                                                                                                                      |
